# Supplementary material
Source: Springer Nature journal article supplement (https://www.springermedizin.de/resource/supplementary/12960_2006_61_MOESM1_ESM.pdf/9570328)

# Goal: Achieving a Sustainable Health Workforce

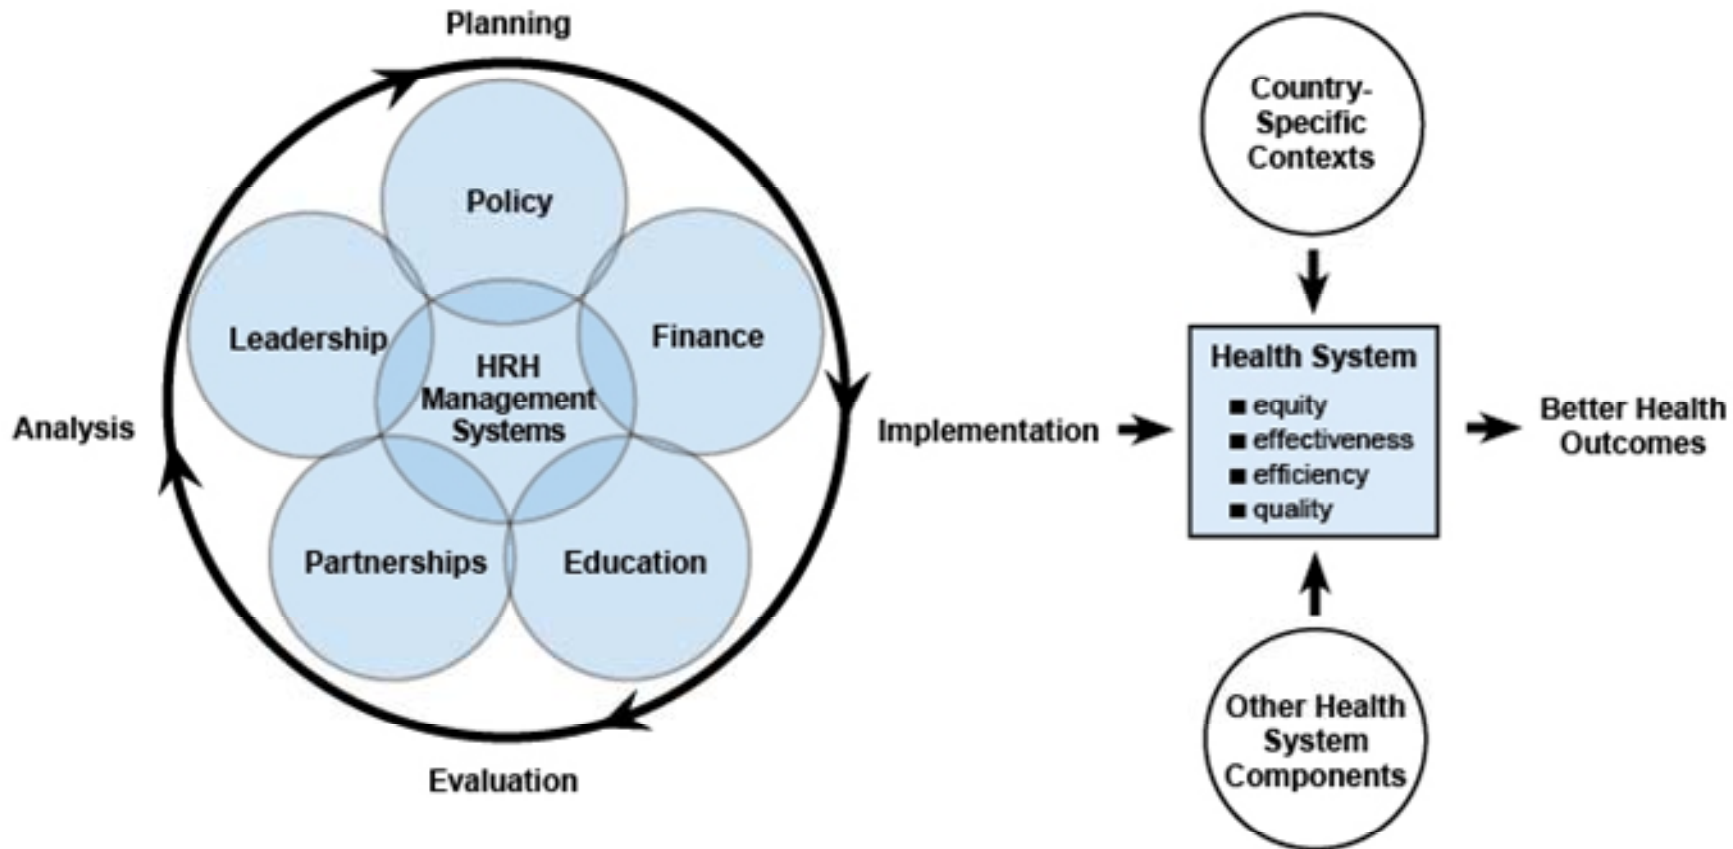

Supplement: MOESM1 [file 9570328]
